# Supplementary material for: A Fine Regulation of the Hippocampal Thyroid Signalling Protects Hypothyroid Mice against Glial Cell Activation
Source: MDPI journal article supplement (doi:10.3390/ijms231911938), 2022-10-08
Supplement: s1 [file s1]

## Supplementary Materials

**Table S1.** Summary table of the statistics (p-value) for TH signaling (related to Figure 1), glial cells (related to Figure 2-3) and Open Field test (Figure 5). Statistical non-parametric two-way ANOVA with permutations tests (strain; treatment; Strain\*treatment effects) were performed followed by post-hoc analysis (indicated on each graph). IHC: immunohistochemistry. ns: not significant.

|                                                                                 | Parameter           | Strain  | Treatment | Strain*Treatment |
|---------------------------------------------------------------------------------|---------------------|---------|-----------|------------------|
|                                                                                 |                     | p-value |           |                  |
| THs level (Figure 1)                                                            | T4                  | ns      | 0.00019   | < 0.00001        |
| TH signaling genes (Figure 2)                                                   | <i>Trα1</i>         | 0.00019 | ns        | 0.001            |
|                                                                                 | <i>Trβ1</i>         | ns      | ns        | 0.006            |
|                                                                                 | <i>Dio2</i>         | ns      | ns        | 0.001            |
|                                                                                 | <i>Dio3</i>         | ns      | ns        | 0.001            |
|                                                                                 | <i>Rc3</i>          | ns      | 0.017     | 0.014            |
|                                                                                 | <i>Klf9</i>         | 0.00039 | ns        | < 0.00001        |
| Reactive astrocytes and activated microglia (western blot analysis; Figure 3-4) | STAT3               | 0.0075  | ns        | ns               |
|                                                                                 | P-STAT3             | ns      | ns        | 0.006            |
|                                                                                 | Ratio P-STAT3/STAT3 | ns      | ns        | 0.003            |
|                                                                                 | CD11B               | 0.0061  | ns        | < 0.00001        |
|                                                                                 | IBA1                | ns      | ns        | ns               |
| Glial cells markers (IHC analysis; Figure 3-4)                                  | IBA1                | 0.0001  | ns        | 0.041            |
|                                                                                 | CD68                | ns      | 0.00019   | < 0.00001        |
|                                                                                 | GFAP                | 0.00019 | ns        | < 0.00001        |
| Open Field test (Figure 5)                                                      | Distance in center  | ns      | ns        | 0.035            |
|                                                                                 | Time in center      | ns      | ns        | 0.015            |
|                                                                                 | Velocity in center  | 0.0039  | ns        | 0.025            |

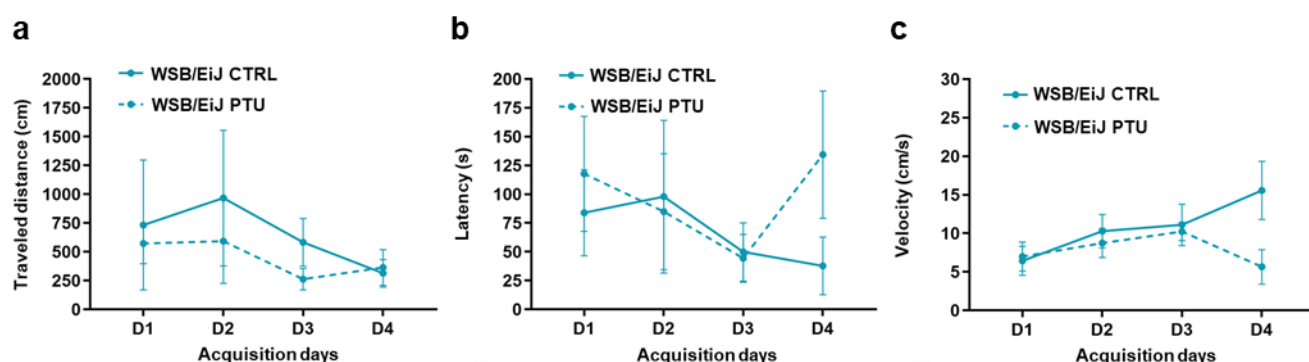

**Figure S1. Learning assessment in WSB/EiJ mice after PTU-treatment.** Measurement of the traveled distance (a) latency (b) and velocity (c) to escape into the box of the Barnes maze during the four acquisition days, evaluating learning performances of euthyroid (CTRL) and hypothyroid (PTU) WSB/EiJ mice (n = 3-4 per group). No statistical analysis was performed because Barnes maze test was not completed on this strain. The data are expressed as mean  $\pm$  SEM.
